# Supplementary material for: Forget the Counselor, This Shampoo Will Revive Your Marriage
Source: Springer Nature journal article supplement (doi:10.1007/s00277-018-3246-4), 2014-01-01
Supplement: MOESM2 [file 15445228]

**Supplementary Table 2. The detailed results of patients in chemotherapy group.**

| **Patient No.** | **MRD response** | **The death time to chemotherapy (Follow-up time)** | **Cause of death** |
| --- | --- | --- | --- |
| 1 | NR | 2 months | Progressive disease |
| 2 | NR | 3 months | Progressive disease |
| 3 | CR | 4 months | Relapse |
| 4 | — | 1 month | Infection |
| 5 | CR | Alive (12 moths) | — |
| 6 | CR | 5 months | Relapse |
| 7 | NR | 2 months | Progressive disease |
| 8 | NR | 2 months | Progressive disease |
| 9 | CR | 4 months | Relapse |
| 10 | NR | 3 months | Progressive disease |
| 11 | NR | 3 months | Progressive disease |
| 12 | CR | 4 months | Relapse |
| 13 | NR | 3 months | Progressive disease |
| 14 | NR | 2 months | Progressive disease |
| 15 | — | 1 month | Infection |
| 16 | CR | 8 months | Relapse |
| 17 | NR | 3 months | Progressive disease |
| 18 | CR | Alive (12 moths) | — |
| 19 | CR | 4 months | Relapse |
| 20 | CR | 5 months | Relalpse |
| 21 | CR | 8 months | Relapse |
| 22 | NR | 3 months | Progressive disease |
| 23 | CR | 5 months | Relalpse |
| 24 | NR | 2 months | Progressive disease |
| 25 | CR | 5 months | Relapse |
| 26 | NR | 3 months | Progressive disease |
| 27 | CR | 4 months | Relapse |
| 28 | — | 1 months | Infection |
| 29 | CR | Alive (12 moths) | — |
| 30 | NR | 3 months | Progressive disease |
| 31 | CR | 5 months | Relapse |
| 32 | NR | 3 months | Progressive disease |
| 33 | NR | 2 months | Progressive disease |
| 34 | CR | 4 months | Relapse |
| 35 | NR | 3 months | Progressive disease |
| 36 | NR | 3 months | Progressive disease |
| 37 | CR | Alive (12 moths) | — |
| 38 | NR | 3 months | Progressive disease |
| 39 | NR | 2 months | Progressive disease |
| 40 | CR | 5 months | Relapse |
| 41 | NR | 3 months | Progressive disease |
| 42 | NR | 3 months | Progressive disease |
| 43 | CR | 5 months | Relapse |
| 44 | NR | 4 months | Progressive disease |
| 45 | NR | 3 months | Progressive disease |
| 46 | NR | 3 months | Progressive disease |
| 47 | CR | Alive (12 moths) | — |
| 48 | NR | 3 months | Progressive disease |
| 49 | CR | 4 months | Relapse |
| 50 | NR | 2 months | Progressive disease |
| 51 | NR | 3 months | Progressive disease |
| 52 | NR | 4 months | Progressive disease |
| 53 | NR | 3 months | Progressive disease |
| 54 | CR | Alive (12 moths) | — |
| 55 | NR | 4 months | Progressive disease |
| 56 | NR | 3 months | Progressive disease |
| 57 | NR | 2 months | Progressive disease |
| 58 | CR | 5 months | Relapse |
| 59 | NR | 3 months | Progressive disease |
| 60 | NR | 4 months | Progressive disease |
| 61 | NR | 3 months | Progressive disease |
| 62 | CR | 12 months | Relapse |
| 63 | NR | 4 months | Progressive disease |
| 64 | NR | 3 months | Progressive disease |
| 65 | NR | 4 months | Progressive disease |
| 66 | CR | Alive (12 moths) | — |
| 67 | NR | 3 months | Progressive disease |
| 68 | NR | 4 months | Progressive disease |
| 69 | NR | 2 months | Progressive disease |

CR, complete remission; NR, not remission
